# Supplementary material for: Invariant Natural Killer T Cells as Key Players in Host Resistance against Paracoccidioides brasiliensis
Source: Hindawi journal article supplement (doi:10.1155/2021/6673722), 2021-04-16

**Supplemental Figure 1. Analysis of CD4 and CD8 T lymphocytes in lung parenchyma.** After exclusion of dead cells, the CD3<sup>+</sup> cells were analyzed for CD4 or CD8 expression and the frequency of CD69-expressing cells was determined within these populations.

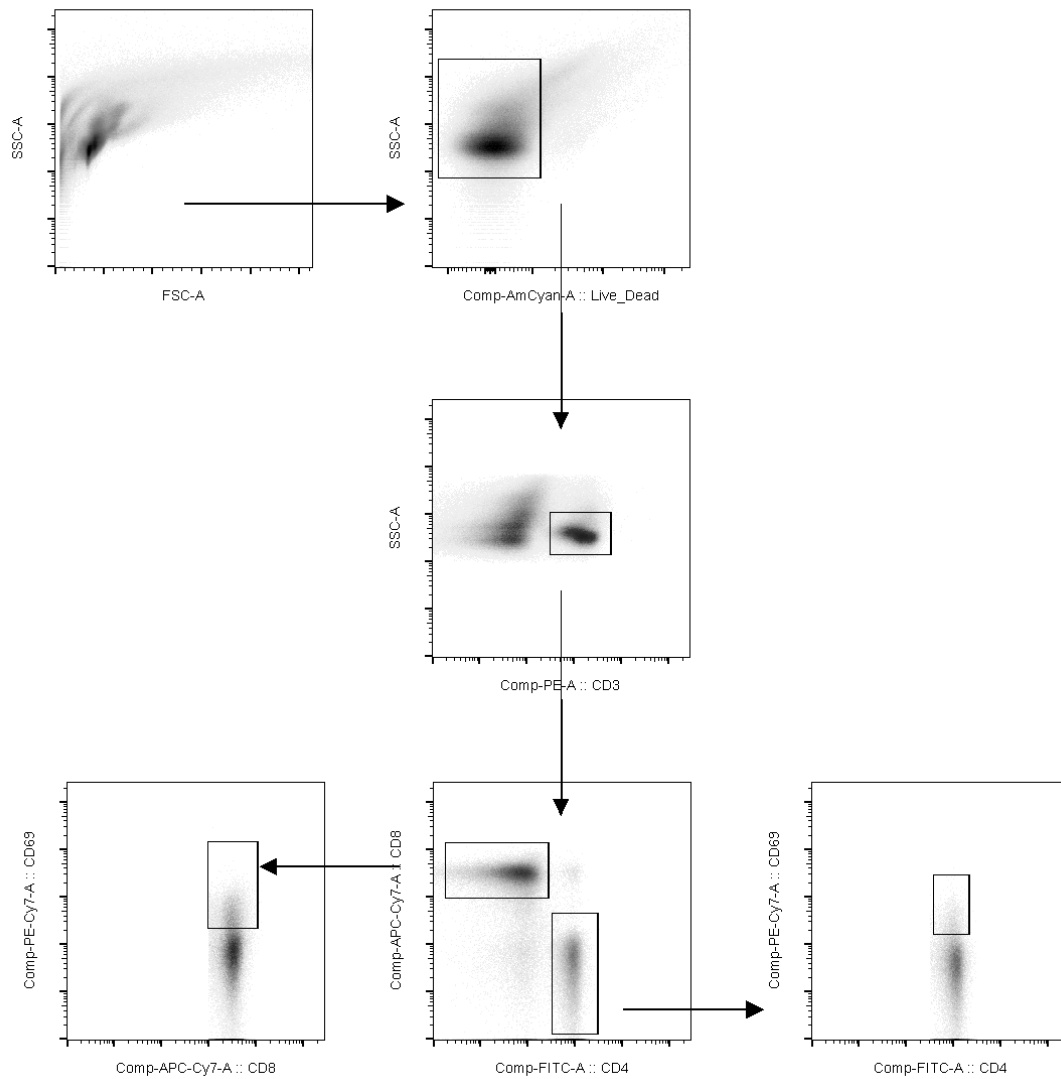

**Supplemental Figure 2. Analysis of GR-1<sup>+</sup>CD11b<sup>+</sup> subsets in lung parenchyma.** After exclusion of dead cells, the GR-1<sup>+</sup> cells, within the CD11b<sup>+</sup> subset, were analyzed according to SSC size (high or low). Next both subsets were analyzed for MHC-II and CD11b expression.

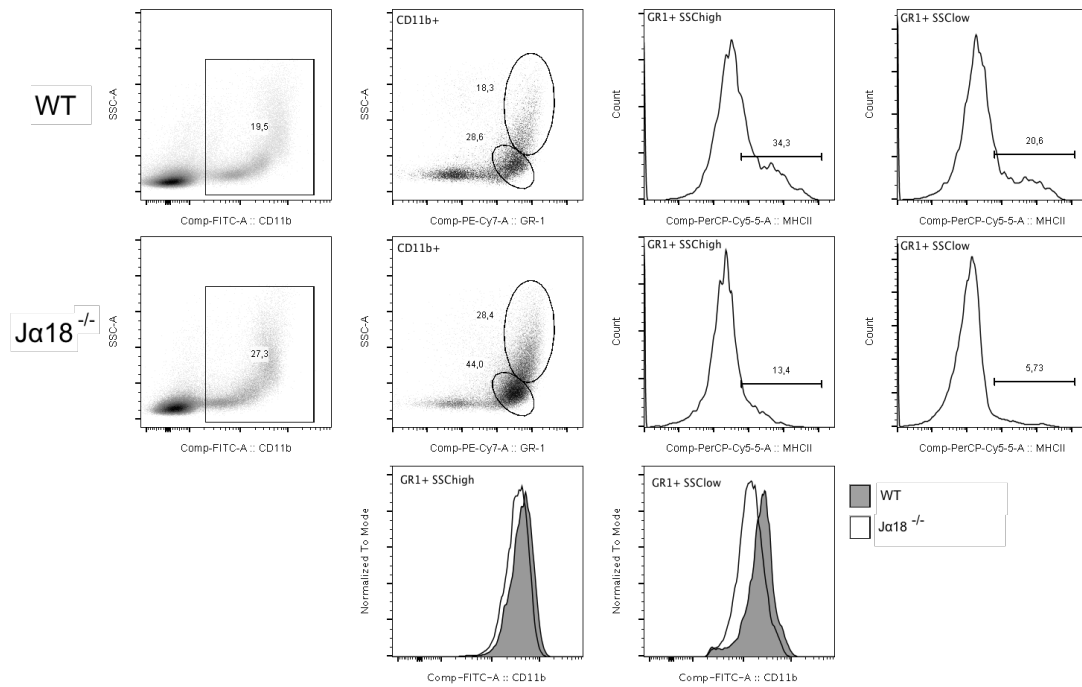

Supplement: f1 [file 6673722.f1.pdf]
